# Supplementary material
Source: HighWire-hosted journal article supplement (https://bmjopen.bmj.com/content/15/1/e085934)
Supplement: inline-supplementary-material-2 [file inline-supplementary-material-2.pdf]

**Supplementary File 2.****Search terms for Cochrane Central Register of Controlled Trials (CENTRAL)**

(nurse\* OR "health personnel\*" OR "nursing staff\*" OR "registered nurse\*" OR "health care personnel\*" OR "healthcare personnel\*" OR "health care worker\*" OR "healthcare worker\*" OR "health care professional\*" OR "healthcare professional\*" OR "health care staff\*" OR "healthcare staff\*" OR "health care provider\*" OR "healthcare provider\*")

AND

("work engagement" OR "work engag\*" OR engag\*)

AND

("randomized controlled trial" OR (randomized AND controlled AND trial))

**Search terms for PubMed**

(nurses[Mesh] OR "health personnel" [Mesh] OR nurse\*[tiab] OR "nursing staff\*" [tiab] OR "registered nurse\*" [tiab] OR "health care personnel\*" [tiab] OR "healthcare personnel\*" [tiab] OR "health care worker\*" [tiab] OR "healthcare worker\*" [tiab] OR "health care professional\*" [tiab] OR "healthcare professional\*" [tiab] OR "health care staff\*" [tiab] OR "healthcare staff\*" [tiab] OR "health care provider\*" [tiab] OR "healthcare provider\*" [tiab])

AND

( "work engagement" [Mesh] OR "work engag\*" [tiab] OR engag\*[tiab])

AND

( "randomized controlled trial" [pt] OR (randomized[tiab] AND controlled[tiab] AND trial[tiab]))

**Search terms for EMBASE**

( "nurses" /de OR "health personnel" /de OR "nurse\*" :ti,ab OR "nursing staff\*" :ti,ab OR "registered nurse\*" :ti,ab OR "health care personnel\*" :ti,ab OR "healthcare personnel\*" :ti,ab OR "health care worker\*" :ti,ab OR "healthcare worker\*" :ti,ab OR "health care professional\*" :ti,ab OR "healthcare professional\*" :ti,ab OR "health care staff\*" :ti,ab OR "healthcare staff\*" :ti,ab OR "health care provider\*" :ti,ab OR "healthcare provider\*" :ti,ab)

AND

( "work engagement" /de OR "work engag\*" :ti,ab OR engag\*:ti,ab)

AND

(randomized:ti,ab AND controlled:ti,ab AND trial:ti,ab)

### Search terms for CINAHL

(MH nurses OR MH "health personnel" OR TI nurse\* OR TI "nursing staff\*" OR TI "registered nurse\*" OR TI "health care personnel\*" OR TI "healthcare personnel\*" OR TI "health care worker\*" OR TI "healthcare worker\*" OR TI "health care professional\*" OR TI "healthcare professional\*" OR TI "healthcare staff\*" OR TI "health care staff\*" OR TI "health care provider\*" OR TI "healthcare provider\*" OR AB nurse\* OR AB "nursing staff\*" OR AB "registered nurse\*" OR AB "health care personnel\*" OR AB "healthcare personnel\*" OR AB "health care worker\*" OR AB "healthcare worker\*" OR AB "health care professional\*" OR AB "healthcare professional\*" OR AB "healthcare staff\*" OR AB "health care staff\*" OR AB "health care provider\*" OR AB "healthcare provider\*" )

AND

(MH "work engagement" OR TI "work engag\*" OR TI engag\* OR AB "work engag\*" OR AB engag\*)

AND

((TI randomized AND TI controlled AND TI trial) OR (AB randomized AND AB controlled AND AB trial))

### Search terms for PsycINFO

(MA nurses OR MA "health personnel" OR TI nurse\* OR TI "nursing staff\*" OR TI "registered nurse\*" OR TI "health care personnel\*" OR TI "healthcare personnel\*" OR TI "health care worker\*" OR TI "healthcare worker\*" OR TI "health care professional\*" OR TI "healthcare professional\*" OR TI "healthcare staff\*" OR TI "health care staff\*" OR TI "health care provider\*" OR TI "healthcare provider\*" OR AB nurse\* OR AB "nursing staff\*" OR AB "registered nurse\*" OR AB "health care personnel\*" OR AB "healthcare personnel\*" OR AB "health care worker\*" OR AB "healthcare worker\*" OR AB "health care professional\*" OR AB "healthcare professional\*" OR AB "healthcare staff\*" OR AB "health care staff\*" OR AB "health care provider\*" OR AB "healthcare provider\*" )

AND

(MA "work engagement" OR TI "work engag\*" OR TI engag\* OR AB "work engag\*" OR AB engag\*)

AND

((TI randomized AND TI controlled AND TI trial) OR (AB randomized AND AB controlled AND AB trial))

**Search terms for The Japan Medical Abstracts Society**

(“看護師”/TH OR “医療従事者”/TH OR “看護師”/TA OR “看護職”/TA OR “ナース”/TA OR “看護スタッフ”/TA OR “正看護師”/TA OR “ヘルスケアワーカー”/TA OR “ヘルスケアプロフェッショナル”/TA OR “ヘルスケアスタッフ”/TA OR “ヘルスケアプロバイダー”/TA) AND (“ワークエンゲージメント”/TH) AND (RD=ランダム化比較試験 OR ((“ランダム化”/TA OR “無作為化”/TA) AND “比較”/TA AND “試験”/TA))
